# Supplementary material
Source: Elsevier journal article supplement (https://www.sciencedirect.com/science/article/pii/S0213911119302249)
Supplement: mmc1 [file S0213911119302249:mmc1.docx]

**Apéndice**

**Cálculo de la esperanza de vida sexual activa (EVSA)**

*Hombres, de 30 a 80 o más años*

| **Age** | **mx** | **qx** | **nlx** | **nLx** | **nTx** | **EVSA** | **πx** | **nLx(DF)** | **nTx(DF)** | **DFLEx** | **DLEx** | **%dfle/tle** |
| --- | --- | --- | --- | --- | --- | --- | --- | --- | --- | --- | --- | --- |
| [30-34] | 0.00064 | 0,00483 | 98803,214 | 493208,275 | 4697182,2 | 49,38 | 0,22055675 | 384427,863 | 2994888,61 | 30,312 | 19,068 | 61,384 |
| [35-39] | 0.00097 | 0,00828 | 98464,9985 | 490999,861 | 4203973,92 | 44,54 | 0,23239437 | 376894,259 | 2610460,75 | 26,512 | 18,028 | 59,523 |
| [40-44] | 0.00166 | 0,01429 | 97881,5132 | 487245,296 | 3712974,06 | 39,74 | 0,22222222 | 378968,564 | 2233566,49 | 22,819 | 16,921 | 57,421 |
| [45-49] | 0.00288 | 0,02292 | 96917,5546 | 481028,582 | 3225728,77 | 35,05 | 0,28110599 | 345808,566 | 1854597,92 | 19,136 | 15,914 | 54,596 |
| [50-54] | 0.00463 | 0,03532 | 95427,3159 | 471972,885 | 2744700,18 | 30,52 | 0,2287234 | 364021,64 | 1508789,36 | 15,811 | 14,709 | 51,805 |
| [55-59] | 0.00719 | 0,05202 | 93270,0771 | 458852,739 | 2272727,3 | 26,17 | 0,29350649 | 324176,48 | 1144767,72 | 12,274 | 13,896 | 46,900 |
| [60-64] | 0.01066 | 0,07854 | 90093,2993 | 440015,043 | 1813874,56 | 22,03 | 0,37121212 | 276676,125 | 820591,236 | 9,108 | 12,922 | 41,345 |
| [65-69] | 0.01633 | 0,12092 | 85584,4621 | 410893,784 | 1373859,52 | 18,1 | 0,41984733 | 238381,127 | 543915,111 | 6,355 | 11,745 | 35,112 |
| [70-74] | 0.02567 | 0,19822 | 78118,2838 | 363126,337 | 962965,734 | 14,41 | 0,55603448 | 161215,572 | 305533,984 | 3,911 | 10,499 | 27,142 |
| [75-79] | 0.04371 | 0,32235 | 66235,9695 | 289511,355 | 599839,397 | 11,03 | 0,65340909 | 100342,004 | 144318,412 | 2,179 | 8,851 | 19,754 |
| 80+ | 0.07610 | 0,32235 | 66235,9695 | 289511,355 | 599839,397 | 8,11 | 0,84810127 | 43976,4084 | 43976,4084 | 0,664 | 7,446 | 8,187 |

*Mujeres, de 30 a 80 o más años*

| **Age** | **mx** | **qx** | **nlx** | **nLx** | **nTx** | **EVSA** | **πx** | **nLx(DF)** | **nTx(DF)** | **DFLEx** | **DLEx** | **%dfle/tle** |
| --- | --- | --- | --- | --- | --- | --- | --- | --- | --- | --- | --- | --- |
| [30-34] | 0.00029 | 0,00083 | 99019,2978 | 494583,985 | 5191766,18 | 55,2 | 0,1970339 | 397134,174 | 2612672,88 | 26,385 | 28,815 | 47,800 |
| [35-39] | 0.00049 | 0,001 | 98803,214 | 493208,275 | 4697182,2 | 50,28 | 0,21573034 | 386808,287 | 2215538,7 | 22,424 | 27,856 | 44,598 |
| [40-44] | 0.00086 | 0,00112 | 98464,9985 | 490999,861 | 4203973,92 | 45,39 | 0,20935961 | 388204,324 | 1828730,42 | 18,572 | 26,818 | 40,917 |
| [45-49] | 0.00143 | 0,00144 | 97881,5132 | 487245,296 | 3712974,06 | 40,58 | 0,24608501 | 367341,532 | 1440526,09 | 14,717 | 25,863 | 36,267 |
| [50-54] | 0.00212 | 0,00245 | 96917,5546 | 481028,582 | 3225728,77 | 35,85 | 0,36461126 | 305640,145 | 1073184,56 | 11,073 | 24,777 | 30,888 |
| [55-59] | 0.00285 | 0,00427 | 95427,3159 | 471972,885 | 2744700,18 | 31,2 | 0,46153846 | 254139,246 | 767544,415 | 8,043 | 23,157 | 25,780 |
| [60-64] | 0.00406 | 0,00711 | 93270,0771 | 458852,739 | 2272727,3 | 26,61 | 0,54145078 | 210406,567 | 513405,169 | 5,505 | 21,105 | 20,686 |
| [65-69] | 0.00640 | 0,01052 | 90093,2993 | 440015,043 | 1813874,56 | 22,1 | 0,64285714 | 157148,229 | 302998,602 | 3,363 | 18,737 | 15,218 |
| [70-74] | 0.01158 | 0,01414 | 85584,4621 | 410893,784 | 1373859,52 | 17,73 | 0,75518672 | 100592,254 | 145850,372 | 1,704 | 16,026 | 9,612 |
| [75-79] | 0.02244 | 0,02011 | 78118,2838 | 363126,337 | 962965,734 | 13,63 | 0,90526316 | 34401,4424 | 45258,1183 | 0,579 | 13,051 | 4,251 |
| [80+] | 0.04741 | 0,03147 | 66235,9695 | 289511,355 | 599839,397 | 9,93 | 0,9625 | 10856,6758 | 10856,6758 | 0,164 | 9,766 | 1,651 |

**Cálculo de la esperanza de vida sexual activa en buena salud (EVSABS)**

*Hombres, de 30 a 80 o más años*

| **Age** | **mx** | **qx** | **nlx** | **nLx** | **nTx** | **EVSABS** | **πx** | **nLx(DF)** | **nTx(DF)** | **DFLEx** | **DLEx** | **%dfle/tle** |
| --- | --- | --- | --- | --- | --- | --- | --- | --- | --- | --- | --- | --- |
| [30-34] | 0.00064 | 0,00322 | 99019,2978 | 494583,985 | 5191766,18 | 49,38 | 0,22065728 | 385450,429 | 3317127,11 | 33,500 | 15,880 | 67,841 |
| [35-39] | 0.00097 | 0,00483 | 98803,214 | 493208,275 | 4697182,2 | 44,54 | 0,216 | 386675,288 | 2931676,68 | 29,672 | 14,868 | 66,618 |
| [40-44] | 0.00166 | 0,00828 | 98464,9985 | 490999,861 | 4203973,92 | 39,74 | 0,22005571 | 382952,538 | 2545001,4 | 25,847 | 13,893 | 65,040 |
| [45-49] | 0.00288 | 0,01429 | 97881,5132 | 487245,296 | 3712974,06 | 35,05 | 0,25222552 | 364349,598 | 2162048,86 | 22,088 | 12,962 | 63,020 |
| [50-54] | 0.00463 | 0,02292 | 96917,5546 | 481028,582 | 3225728,77 | 30,52 | 0,20394737 | 382924,069 | 1797699,26 | 18,549 | 11,971 | 60,776 |
| [55-59] | 0.00719 | 0,03532 | 95427,3159 | 471972,885 | 2744700,18 | 26,17 | 0,2369338 | 360146,557 | 1414775,19 | 14,826 | 11,344 | 56,651 |
| [60-64] | 0.01066 | 0,05202 | 93270,0771 | 458852,739 | 2272727,3 | 22,03 | 0,33458647 | 305326,822 | 1054628,63 | 11,307 | 10,723 | 51,327 |
| [65-69] | 0.01633 | 0,07854 | 90093,2993 | 440015,043 | 1813874,56 | 18,1 | 0,33125 | 294260,06 | 749301,811 | 8,317 | 9,783 | 45,950 |
| [70-74] | 0.02567 | 0,12092 | 85584,4621 | 410893,784 | 1373859,52 | 14,41 | 0,47540984 | 215550,837 | 455041,751 | 5,317 | 9,093 | 36,897 |
| [75-79] | 0.04371 | 0,19822 | 78118,2838 | 363126,337 | 962965,734 | 11,03 | 0,51764706 | 175155,057 | 239490,913 | 3,066 | 7,964 | 27,795 |
| [80+] | 0.07610 | 0,32235 | 66235,9695 | 289511,355 | 599839,397 | 8,11 | 0,77777778 | 64335,8568 | 64335,8568 | 0,971 | 7,139 | 11,977 |

*Mujeres, de 30 a 80 o más años*

| **Age** | **mx** | **qx** | **nlx** | **nLx** | **nTx** | **EVSABS** | **πx** | **nLx(DF)** | **nTx(DF)** | **DFLEx** | **DLEx** | **%dfle/tle** |
| --- | --- | --- | --- | --- | --- | --- | --- | --- | --- | --- | --- | --- |
| [30-34] | 0.00029 | 0,00083 | 99019,2978 | 494583,985 | 5191766,18 | 55,2 | 0,19607843 | 397606,733 | 2734194,22 | 27,613 | 27,587 | 50,023 |
| [35-39] | 0.00049 | 0,001 | 98803,214 | 493208,275 | 4697182,2 | 50,28 | 0,20380435 | 392690,284 | 2336587,49 | 23,649 | 26,631 | 47,034 |
| [40-44] | 0.00086 | 0,00112 | 98464,9985 | 490999,861 | 4203973,92 | 45,39 | 0,19426752 | 395614,538 | 1943897,2 | 19,742 | 25,648 | 43,494 |
| [45-49] | 0.00143 | 0,00144 | 97881,5132 | 487245,296 | 3712974,06 | 40,58 | 0,23417722 | 373143,55 | 1548282,66 | 15,818 | 24,762 | 38,980 |
| [50-54] | 0.00212 | 0,00245 | 96917,5546 | 481028,582 | 3225728,77 | 35,85 | 0,344 | 315554,75 | 1175139,11 | 12,125 | 23,725 | 33,822 |
| [55-59] | 0.00285 | 0,00427 | 95427,3159 | 471972,885 | 2744700,18 | 31,2 | 0,4375 | 265484,748 | 859584,363 | 9,008 | 22,192 | 28,871 |
| [60-64] | 0.00406 | 0,00711 | 93270,0771 | 458852,739 | 2272727,3 | 26,61 | 0,50236967 | 228339,041 | 594099,615 | 6,370 | 20,240 | 23,937 |
| [65-69] | 0.00640 | 0,01052 | 90093,2993 | 440015,043 | 1813874,56 | 22,1 | 0,58778626 | 181380,247 | 365760,575 | 4,060 | 18,040 | 18,370 |
| [70-74] | 0.01158 | 0,01414 | 85584,4621 | 410893,784 | 1373859,52 | 17,73 | 0,72043011 | 114873,531 | 184380,328 | 2,154 | 15,576 | 12,151 |
| [75-79] | 0.02244 | 0,02011 | 78118,2838 | 363126,337 | 962965,734 | 13,63 | 0,84482759 | 56347,1902 | 69506,7973 | 0,890 | 12,740 | 6,528 |
| [80+] | 0.04741 | 0,03147 | 66235,9695 | 289511,355 | 599839,397 | 9,93 | 0,95454545 | 13159,6071 | 13159,6071 | 0,199 | 9,731 | 2,001 |

**Cálculo de la esperanza de vida sexual activa en mala salud (EVSAMS)**

*Hombres, de 30 a 80 o más años*

| **Age** | **mx** | **qx** | **nlx** | **nLx** | **nTx** | **EVSAMS** | **πx** | **nLx(DF)** | **nTx(DF)** | **DFLEx** | **DLEx** | **%dfle/tle** |
| --- | --- | --- | --- | --- | --- | --- | --- | --- | --- | --- | --- | --- |
| [35-39] | 0.00064 | 0,00483 | 98803,214 | 493208,275 | 4697182,2 | 49,38 | 0,2195122 | 384943,044 | 2586123,47 | 26,174 | 23,206 | 53,006 |
| [40-44] | 0.00097 | 0,00828 | 98464,9985 | 490999,861 | 4203973,92 | 44,54 | 0,36 | 314239,911 | 2201180,43 | 22,355 | 22,185 | 50,191 |
| [45-49] | 0.00166 | 0,01429 | 97881,5132 | 487245,296 | 3712974,06 | 39,74 | 0,23809524 | 371234,512 | 1886940,52 | 19,278 | 20,462 | 48,510 |
| [50-54] | 0.00288 | 0,02292 | 96917,5546 | 481028,582 | 3225728,77 | 35,05 | 0,3655914 | 305168,671 | 1515706,01 | 15,639 | 19,411 | 44,619 |
| [55-59] | 0.00463 | 0,03532 | 95427,3159 | 471972,885 | 2744700,18 | 30,52 | 0,33333333 | 314648,59 | 1210537,33 | 12,685 | 17,835 | 41,564 |
| [60-64] | 0.00719 | 0,05202 | 93270,0771 | 458852,739 | 2272727,3 | 26,17 | 0,45360825 | 250713,352 | 895888,744 | 9,605 | 16,565 | 36,704 |
| [65-69] | 0.01066 | 0,07854 | 90093,2993 | 440015,043 | 1813874,56 | 22,03 | 0,44615385 | 243700,639 | 645175,392 | 7,161 | 14,869 | 32,507 |
| [70-74] | 0.01633 | 0,12092 | 85584,4621 | 410893,784 | 1373859,52 | 18,1 | 0,55445545 | 183071,488 | 401474,753 | 4,691 | 13,409 | 25,917 |
| [75-79] | 0.02567 | 0,19822 | 78118,2838 | 363126,337 | 962965,734 | 14,41 | 0,65420561 | 125567,051 | 218403,266 | 2,796 | 11,614 | 19,402 |
| [80+] | 0.04371 | 0,32235 | 66235,9695 | 289511,355 | 599839,397 | 11,03 | 0,78021978 | 63628,8693 | 92836,2145 | 1,402 | 9,628 | 12,707 |

*Mujeres, de 30 a 80 o más años*

| **Age** | **mx** | **qx** | **nlx** | **nLx** | **nTx** | **EVSAMS** | **πx** | **nLx(DF)** | **nTx(DF)** | **DFLEx** | **DLEx** | **%dfle/tle** |
| --- | --- | --- | --- | --- | --- | --- | --- | --- | --- | --- | --- | --- |
| [30-34] | 0.00029 | 0,00083 | 99019,2978 | 494583,985 | 5191766,18 | 55,2 | 0,2195122 | 386016,768 | 2662766,63 | 26,891 | 28,309 | 48,716 |
| [35-39] | 0.00049 | 0,001 | 98803,214 | 493208,275 | 4697182,2 | 50,28 | 0,36 | 315653,296 | 2276749,86 | 23,043 | 27,237 | 45,830 |
| [40-44] | 0.00086 | 0,00112 | 98464,9985 | 490999,861 | 4203973,92 | 45,39 | 0,23809524 | 374095,132 | 1961096,56 | 19,917 | 25,473 | 43,879 |
| [45-49] | 0.00143 | 0,00144 | 97881,5132 | 487245,296 | 3712974,06 | 40,58 | 0,3655914 | 309112,607 | 1587001,43 | 16,213 | 24,367 | 39,954 |
| [50-54] | 0.00212 | 0,00245 | 96917,5546 | 481028,582 | 3225728,77 | 35,85 | 0,33333333 | 320685,722 | 1277888,82 | 13,185 | 22,665 | 36,779 |
| [55-59] | 0.00285 | 0,00427 | 95427,3159 | 471972,885 | 2744700,18 | 31,2 | 0,45360825 | 257882,092 | 957203,103 | 10,031 | 21,169 | 32,150 |
| [60-64] | 0.00406 | 0,00711 | 93270,0771 | 458852,739 | 2272727,3 | 26,61 | 0,44615385 | 254133,824 | 699321,011 | 7,498 | 19,112 | 28,177 |
| [65-69] | 0.00640 | 0,01052 | 90093,2993 | 440015,043 | 1813874,56 | 22,1 | 0,55445545 | 196046,306 | 445187,186 | 4,941 | 17,159 | 22,359 |
| [70-74] | 0.01158 | 0,01414 | 85584,4621 | 410893,784 | 1373859,52 | 17,73 | 0,65420561 | 142084,766 | 249140,88 | 2,911 | 14,819 | 16,419 |
| [75-79] | 0.02244 | 0,02011 | 78118,2838 | 363126,337 | 962965,734 | 13,63 | 0,78021978 | 79807,9861 | 107056,114 | 1,370 | 12,260 | 10,055 |
| [80+] | 0.04741 | 0,03147 | 66235,9695 | 289511,355 | 599839,397 | 9,93 | 0,90588235 | 27248,1276 | 27248,1276 | 0,411 | 9,519 | 4,143 |

**Cálculo de la esperanza de vida sexual activa en buena salud sexual (EVSABSS)**

*Hombres, de 30 a 80 o más años*

| **Age** | **mx** | **qx** | **nlx** | **nLx** | **nTx** | **EVSABSS** | **πx** | **nLx(DF)** | **nTx(DF)** | **DFLEx** | **DLEx** | **%dfle/tle** |
| --- | --- | --- | --- | --- | --- | --- | --- | --- | --- | --- | --- | --- |
| [30-34] | 0.00064 | 0,00322 | 99019,2978 | 494583,985 | 5191766,18 | 49,38 | 0,19858156 | 396368,725 | 3622833,41 | 36,587 | 12,793 | 74,093 |
| [35-39] | 0.00097 | 0,00483 | 98803,214 | 493208,275 | 4697182,2 | 44,54 | 0,20212766 | 393517,241 | 3226464,69 | 32,655 | 11,885 | 73,317 |
| [40-44] | 0.00166 | 0,00828 | 98464,9985 | 490999,861 | 4203973,92 | 39,74 | 0,19337017 | 396055,136 | 2832947,45 | 28,771 | 10,969 | 72,398 |
| [45-49] | 0.00288 | 0,01429 | 97881,5132 | 487245,296 | 3712974,06 | 35,05 | 0,24444444 | 368140,891 | 2436892,31 | 24,896 | 10,154 | 71,031 |
| [50-54] | 0.00463 | 0,02292 | 96917,5546 | 481028,582 | 3225728,77 | 30,52 | 0,16835017 | 400047,34 | 2068751,42 | 21,345 | 9,175 | 69,939 |
| [55-59] | 0.00719 | 0,03532 | 95427,3159 | 471972,885 | 2744700,18 | 26,17 | 0,22695035 | 364858,472 | 1668704,08 | 17,487 | 8,683 | 66,819 |
| [60-64] | 0.01066 | 0,05202 | 93270,0771 | 458852,739 | 2272727,3 | 22,03 | 0,29317269 | 324329,647 | 1303845,61 | 13,979 | 8,051 | 63,456 |
| [65-69] | 0.01633 | 0,07854 | 90093,2993 | 440015,043 | 1813874,56 | 18,1 | 0,25 | 330011,282 | 979515,962 | 10,872 | 7,228 | 60,068 |
| [70-74] | 0.02567 | 0,12092 | 85584,4621 | 410893,784 | 1373859,52 | 14,41 | 0,35051546 | 266869,159 | 649504,68 | 7,589 | 6,821 | 52,665 |
| [75-79] | 0.04371 | 0,19822 | 78118,2838 | 363126,337 | 962965,734 | 11,03 | 0,29508197 | 255974,303 | 382635,521 | 4,898 | 6,132 | 44,408 |
| [80+] | 0.07610 | 0,32235 | 66235,9695 | 289511,355 | 599839,397 | 8,11 | 0,5625 | 126661,218 | 126661,218 | 1,912 | 6,198 | 23,579 |

*Mujeres, de 30 a 80 o más años*

| **Age** | **mx** | **qx** | **nlx** | **nLx** | **nTx** | **EVSABSS** | **πx** | **nLx(DF)** | **nTx(DF)** | **DFLEx** | **DLEx** | **%dfle/tle** |
| --- | --- | --- | --- | --- | --- | --- | --- | --- | --- | --- | --- | --- |
| [30-34] | 0.00029 | 0,00083 | 99019,298 | 494583,985 | 5191766,18 | 55,2 | 0,17274939 | 409144,902 | 3156320,03 | 31,876 | 23,324 | 57,746 |
| [35-39] | 0.00049 | 0,001 | 98803,214 | 493208,275 | 4697182,2 | 50,28 | 0,18372703 | 402592,581 | 2747175,13 | 27,805 | 22,475 | 55,299 |
| [40-44] | 0.00086 | 0,00112 | 98464,999 | 490999,861 | 4203973,92 | 45,39 | 0,15361446 | 415575,184 | 2344582,55 | 23,811 | 21,579 | 52,459 |
| [45-49] | 0.00143 | 0,00144 | 97881,513 | 487245,296 | 3712974,06 | 40,58 | 0,20720721 | 386284,559 | 1929007,37 | 19,708 | 20,872 | 48,565 |
| [50-54] | 0.00212 | 0,00245 | 96917,555 | 481028,582 | 3225728,77 | 35,85 | 0,2375 | 366784,294 | 1542722,81 | 15,918 | 19,932 | 44,401 |
| [55-59] | 0.00285 | 0,00427 | 95427,316 | 471972,885 | 2744700,18 | 31,2 | 0,33913043 | 311912,516 | 1175938,51 | 12,323 | 18,877 | 39,496 |
| [60-64] | 0.00406 | 0,00711 | 93270,077 | 458852,739 | 2272727,3 | 26,61 | 0,37305699 | 287674,515 | 864025,997 | 9,264 | 17,346 | 34,813 |
| [65-69] | 0.00640 | 0,01052 | 90093,299 | 440015,043 | 1813874,56 | 22,1 | 0,47863248 | 229409,552 | 576351,482 | 6,397 | 15,703 | 28,947 |
| [70-74] | 0.01158 | 0,01414 | 85584,462 | 410893,784 | 1373859,52 | 17,73 | 0,53246753 | 192106,185 | 346941,93 | 4,054 | 13,676 | 22,864 |
| [75-79] | 0.02244 | 0,02011 | 78118,284 | 363126,337 | 962965,734 | 13,63 | 0,6875 | 113476,98 | 154835,745 | 1,982 | 11,648 | 14,542 |
| [80+] | 0.04741 | 0,03147 | 66235,970 | 289511,355 | 599839,397 | 9,93 | 0,85714286 | 41358,7651 | 41358,7651 | 0,624 | 9,306 | 6,288 |

**Cálculo de la esperanza de vida sexual activa en mala salud sexual (EVSAMSS)**

*Hombres, de 30 a 80 o más años*

| **Age** | **mx** | **qx** | **nlx** | **nLx** | **nTx** | **EVSAMSS** | **πx** | **nLx(DF)** | **nTx(DF)** | **DFLEx** | **DLEx** | **%dfle/tle** |
| --- | --- | --- | --- | --- | --- | --- | --- | --- | --- | --- | --- | --- |
| [30-34] | 0.00064 | 0,00322 | 99019,2978 | 494583,985 | 5191766,18 | 49,38 | 0,43243243 | 280709,829 | 2280300,19 | 23,029 | 26,351 | 46,636 |
| [35-39] | 0.00097 | 0,00483 | 98803,214 | 493208,275 | 4697182,2 | 44,54 | 0,48780488 | 252618,873 | 1999590,36 | 20,238 | 24,302 | 45,438 |
| [40-44] | 0.00166 | 0,00828 | 98464,9985 | 490999,861 | 4203973,92 | 39,74 | 0,41509434 | 287188,598 | 1746971,49 | 17,742 | 21,998 | 44,645 |
| [45-49] | 0.00288 | 0,01429 | 97881,5132 | 487245,296 | 3712974,06 | 35,05 | 0,42647059 | 279449,508 | 1459782,89 | 14,914 | 20,136 | 42,550 |
| [50-54] | 0.00463 | 0,02292 | 96917,5546 | 481028,582 | 3225728,77 | 30,52 | 0,41428571 | 281745,313 | 1180333,38 | 12,179 | 18,341 | 39,904 |
| [55-59] | 0.00719 | 0,03532 | 95427,3159 | 471972,885 | 2744700,18 | 26,17 | 0,46590909 | 252076,427 | 898588,068 | 9,416 | 16,754 | 35,982 |
| [60-64] | 0.01066 | 0,05202 | 93270,0771 | 458852,739 | 2272727,3 | 22,03 | 0,47058824 | 242922,038 | 646511,641 | 6,932 | 15,098 | 31,464 |
| [65-69] | 0.01633 | 0,07854 | 90093,2993 | 440015,043 | 1813874,56 | 18,1 | 0,59259259 | 179265,388 | 403589,603 | 4,480 | 13,620 | 24,750 |
| [70-74] | 0.02567 | 0,12092 | 85584,4621 | 410893,784 | 1373859,52 | 14,41 | 0,6875 | 128404,307 | 224324,215 | 2,621 | 11,789 | 18,189 |
| [75-79] | 0.04371 | 0,19822 | 78118,2838 | 363126,337 | 962965,734 | 11,03 | 0,8172043 | 66377,9325 | 95919,9076 | 1,228 | 9,802 | 11,132 |
| [80+] | 0.07610 | 0,32235 | 66235,9695 | 289511,355 | 599839,397 | 8,11 | 0,89795918 | 29541,975 | 29541,975 | 0,446 | 7,664 | 5,500 |

*Mujeres, de 30 a 80 o más años*

| **Age** | **mx** | **qx** | **nlx** | **nLx** | **nTx** | **EVSAMSS** | **πx** | **nLx(DF)** | **nTx(DF)** | **DFLEx** | **DLEx** | **%dfle/tle** |
| --- | --- | --- | --- | --- | --- | --- | --- | --- | --- | --- | --- | --- |
| [30-34] | 0.00029 | 0,00083 | 99019,2978 | 494583,985 | 5191766,18 | 55,2 | 0,37037037 | 311404,731 | 2092037,31 | 21,128 | 34,072 | 38,275 |
| [35-39] | 0.00049 | 0,001 | 98803,214 | 493208,275 | 4697182,2 | 50,28 | 0,38709677 | 302288,943 | 1780632,58 | 18,022 | 32,258 | 35,843 |
| [40-44] | 0.00086 | 0,00112 | 98464,9985 | 490999,861 | 4203973,92 | 45,39 | 0,421875 | 283859,295 | 1478343,64 | 15,014 | 30,376 | 33,078 |
| [45-49] | 0.00143 | 0,00144 | 97881,5132 | 487245,296 | 3712974,06 | 40,58 | 0,3125 | 334981,141 | 1194484,34 | 12,203 | 28,377 | 30,072 |
| [50-54] | 0.00212 | 0,00245 | 96917,5546 | 481028,582 | 3225728,77 | 35,85 | 0,54464286 | 219039,801 | 859503,202 | 8,868 | 26,982 | 24,738 |
| [55-59] | 0.00285 | 0,00427 | 95427,3159 | 471972,885 | 2744700,18 | 31,2 | 0,58064516 | 197924,113 | 640463,401 | 6,712 | 24,488 | 21,511 |
| [60-64] | 0.00406 | 0,00711 | 93270,0771 | 458852,739 | 2272727,3 | 26,61 | 0,63043478 | 169576,012 | 442539,288 | 4,745 | 21,865 | 17,831 |
| [65-69] | 0.00640 | 0,01052 | 90093,2993 | 440015,043 | 1813874,56 | 22,1 | 0,68932039 | 136703,703 | 272963,276 | 3,030 | 19,070 | 13,709 |
| [70-74] | 0.01158 | 0,01414 | 85584,4621 | 410893,784 | 1373859,52 | 17,73 | 0,76530612 | 96434,2554 | 136259,574 | 1,592 | 16,138 | 8,980 |
| [75-79] | 0.02244 | 0,02011 | 78118,2838 | 363126,337 | 962965,734 | 13,63 | 0,90361446 | 35000,1288 | 39825,3181 | 0,510 | 13,120 | 3,740 |
| [80+] | 0.04741 | 0,03147 | 66235,9695 | 289511,355 | 599839,397 | 9,93 | 0,98333333 | 4825,18926 | 4825,18926 | 0,073 | 9,857 | 0,734 |
